# Supplementary material
Source: MDPI journal article supplement (https://www.mdpi.com/2075-163X/4/1/74)
Supplement: s1 [file s1]

## Supporting Information

**Figure S1.** *S. oneidensis* WT strain producing non-crystalline U(IV). (a) STXM carbon speciation represented by red-green-blue tri-color map. Protein is shown in red, lipid in green, and polysaccharide in blue. (b) Corresponding U map showing the co-localization of U with EPS. The scale bar corresponds to 1  $\mu\text{m}$ .

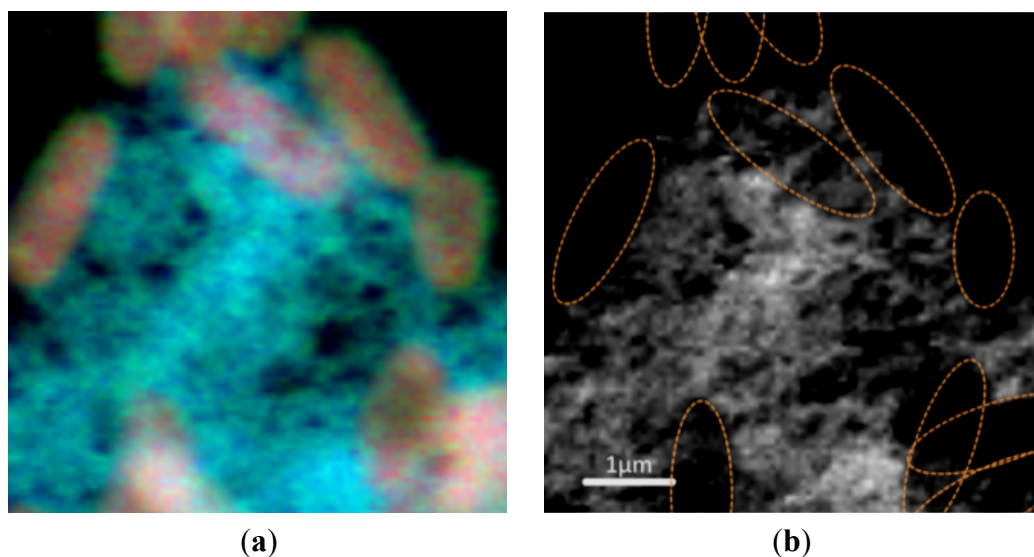

**Figure S2.** Reference spectra for the generation of the tricolor map in Figure 5.

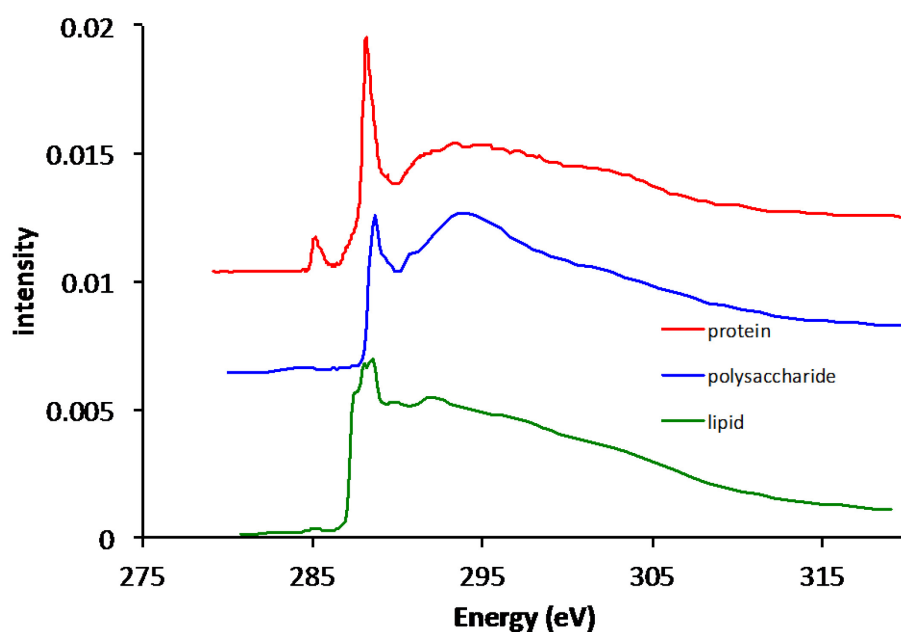

**Figure S3.** Reference spectrum for uranium as  $\text{UO}_2\text{Cl}_2$ .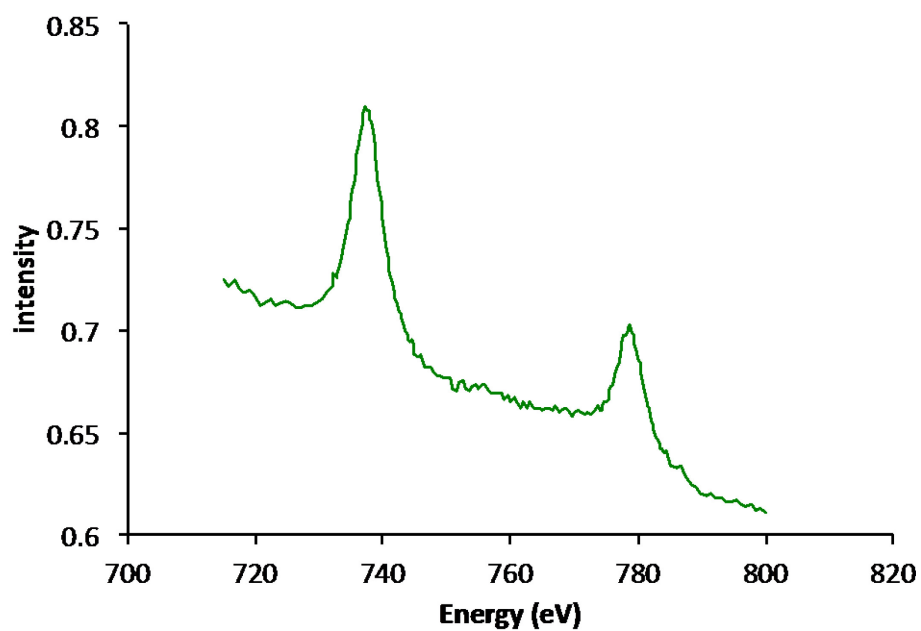

© 2014 by the authors; licensee MDPI, Basel, Switzerland. This article is an open access article distributed under the terms and conditions of the Creative Commons Attribution license (<http://creativecommons.org/licenses/by/3.0/>).
